# Supplementary material for: High Sensitivity Protein Gel Electrophoresis Label Compatible with Mass-Spectrometry
Source: PubMed Central journal article supplement (PMC7694097; doi:10.3390/bios10110160), 2020-10-31
Supplement: biosensors-10-00160-s001.pdf [file biosensors-10-00160-s001.pdf]

## Supplementary materials

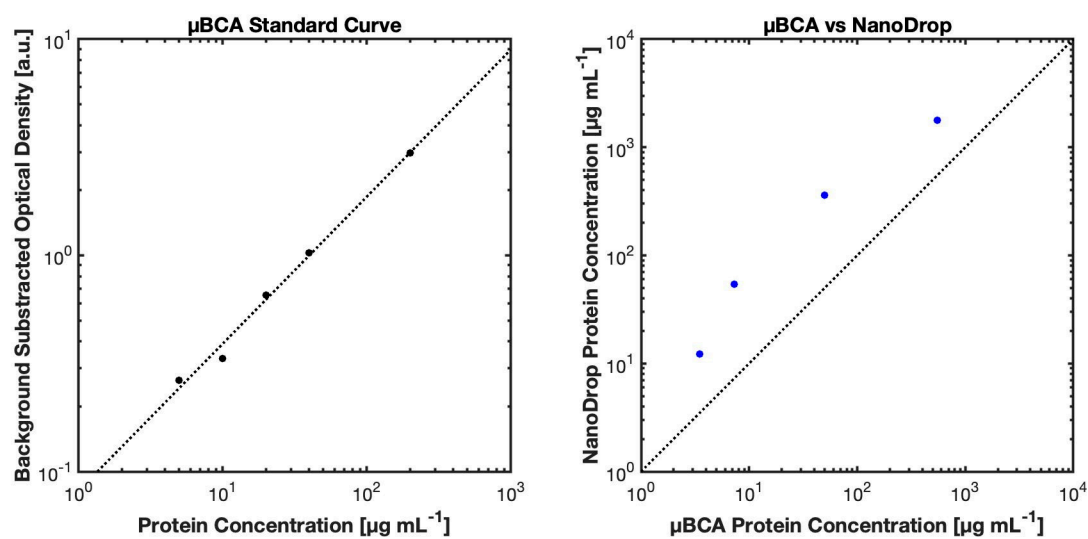

**Supplementary Figure S1.** A standard curve (left plot) was created using protein standards included with the  $\mu$ BCA assay (ThermoFisher Scientific). The standard curve was used to derive the protein concentration of 4 different isolations of extracellular vesicle-rich tissue culture medium. These samples were also measured using NanoDrop with datapoints for each technique plotted against one another (right plot). NanoDrop consistently overestimated protein concentration by 13 to 29 %.
